1 **Structural basis of RNA polymerase recycling by the Swi2/Snf2 ATPase RapA in**  
2 ***Escherichia coli***

3

4 M. Zuhaib Qayyum<sup>1</sup>, Vadim Molodtsov<sup>1,2</sup>, Andrew Renda<sup>1</sup> and Katsuhiko S. Murakami<sup>1\*</sup>

5

6 <sup>1</sup>*Department of Biochemistry and Molecular Biology, The Center for RNA Molecular Biology,*  
7 *Pennsylvania State University, University Park, PA 16802, USA.*

8 <sup>2</sup>*Current address: Waksman Institute of Microbiology and Department of Chemistry and*  
9 *Chemical Biology, Rutgers University, Piscataway, NJ 08854, USA.*

10

11 \*Corresponding author

12 Email: [kum14@psu.edu](mailto:kum14@psu.edu)

13

14 **ABSTRACT**

15 After transcription termination, cellular RNA polymerases (RNAPs) are occasionally trapped on  
16 DNA, impounded in an undefined Post-Termination Complex (PTC), limiting free RNAP pool  
17 and making transcription inefficient. In *Escherichia coli*, a Swi2/Snf2 ATPase RapA is involved  
18 in countering such inefficiency through RNAP recycling. To understand its mechanism of RNAP  
19 recycling, we have determined the cryo-electron microscopy (cryo-EM) structures of two sets of  
20 *E. coli* RapA-RNAP complexes along with RNAP core enzyme and elongation complex (EC). The  
21 structures revealed the large conformational changes of RNAP and RapA upon their association  
22 implicated in the hindrance in PTC formation. Our study reveals that although RapA binds away  
23 from the DNA binding channel of RNAP, it can close the RNAP clamp allosterically thereby  
24 preventing its non-specific DNA binding. Together with DNA binding assays, we propose that  
25 RapA acts as a guardian of RNAP by which prevents non-specific DNA binding of RNAP without  
26 affecting the sigma factor binding to RNAP core enzyme, thereby enhancing RNAP recycling.

27

28 **Keywords**

29 RNAP recycling, RapA, Post-Termination Complex (PTC), cryo-EM

30

31

## 32 INTRODUCTION

33 Bacterial multi-subunit DNA-dependent RNA polymerase (RNAP) is a fast and processive  
34 enzyme that can perform RNA synthesis at a rate of 90 nt/sec for thousands of nucleotides during  
35 elongation phase of transcription in a purified system (1). However, in biological systems, this  
36 process is not monotonous but encompasses a wide array of regulatory mechanisms giving  
37 different functional outputs. Transcriptional pausing is one such process and plays important roles  
38 in transcription regulation, RNA folding and transcription-translation coupling (2,3). It also serves  
39 as an early step during transcription termination (4-7). A transcribing RNAP also halts when it  
40 encounters a DNA lesion (8). Therefore, the transcribing RNAP requires a series of accessory  
41 factors to achieve transcription speeds like those achieved in a purified system.

42 General elongation factors NusA and NusG bind RNAP to regulate the rate of transcription,  
43 half-life of transcription pausing, mediate transcription-translation coupling, and facilitate  
44 transcription termination (9-14). Due to nucleotide misincorporation into RNA, a backward  
45 translocation of RNAP along DNA (as known as RNAP backtracking) temporarily arrests RNA  
46 synthesis (15,16). To mitigate such events, transcription factors GreA/B bind to RNAP secondary  
47 channel to cleave backtracked RNA including mis-incorporated nucleotides for restarting RNA  
48 synthesis (17,18).

49 DNA damage, stalling events, and collisions with template-bound proteins halt RNA  
50 elongation. Mfd, an ATP-dependent motor enzyme, is a part of transcription-coupled repair (TCR)  
51 system that binds upstream DNA to the stalled RNAP, triggers transcription bubble collapse, and  
52 the dissociation of RNAP from the DNA by virtue of its translocase activity (17,19-21). A recent  
53 study also reveals the participation of an RNase (RNase J1) in resolving such stalled RNAPs  
54 (22). The last phase of the transcription cycle (as known as transcription termination) is also  
55 regulated by another ATP-dependent helicase/translocase Rho, that translocates along nascent  
56 RNA and dislodges the EC after interacting with RNAP, NusA and NusG (23-26).

57 During the transcription termination, RNAP releases RNA product and dissociates from  
58 the template DNA to prepare for a next round of transcription (RNAP recycling). However, some  
59 RNAPs form an undefined post-transcription/post-termination complex (PTC) (27) that prevents  
60 RNAP recycling, thus inhibits gene expression. In firmicutes and actinobacteria, transcription  
61 factor HelD, a RNAP associated superfamily 1 (SF1) ATPase, is involved in RNAP recycling  
62 (28,29). Recent cryo-EM studies of the RNAP-HelD complex (29-31) revealed that the HelD

63 inserts its two domains deep into the RNAP main and secondary channels akin a prong to de-  
64 stabilize the EC. Dissociation of HelD from the RNAP is an active process that utilizes energy  
65 from ATP hydrolysis by HelD (29-31).

66 In proteobacteria including *E. coli*, RNAP recycling is facilitated by RapA, a Swi/Snf2  
67 protein superfamily ATPase (32) (Fig. 1A). RapA was first observed as a co-purifying protein  
68 named  $\tau$  factor with *E. coli* RNAP about 50 years ago in a study that discovered promoter  
69 specificity  $\sigma^{70}$  factor (33). The studies on Swi2/Snf2 family of enzymes have mostly focused on  
70 their roles in chromatin and nucleosome remodeling in eukaryotes (34). Interestingly, some  
71 members of the family, such as RapA, do not modify chromatin structure. Instead, its direct  
72 interaction with RNAP enhances RNA expression by facilitating RNAP recycling (35).

73 Biochemical studies of RapA characterized its enzymatic activities and modes of binding  
74 to RNAP (36-41). A model of RapA-mediated RNAP recycling proposes that RapA binds to a  
75 PTC, remodels it by utilizing its ATPase activity and releases the sequestered RNAP (35). The X-  
76 ray crystal structure of RapA revealed the organization of its ATPase catalytic domains: two RecA-  
77 like lobe domains and two Swi/Snf2-like domains together forming the ATP binding pocket (SFig.  
78 1A) (42). The X-ray structure of the *E. coli* RNAP elongation complex (EC) with RapA (EC-  
79 RapA) revealed that RapA binds around the RNA exit channel of RNAP without conformational  
80 change from its apo-form structure (43) (SFig. 1D). This study speculated that RapA reactivates  
81 stalled RNAPs by means of an ATP-driven backward translocation mechanism. However, the role  
82 of RapA in RNAP recycling was not discussed.

83 To understand the mechanism of RNAP recycling by RapA, we determined four sets of  
84 cryo-electron microscopy (cryo-EM) structures including the *E. coli* RNAP EC, RNAP EC with  
85 RapA (EC-RapA), RNAP core enzyme (RNAP), and RNAP with RapA (RNAP-RapA binary  
86 complex). The structures reveal the conformational changes induced in RNAP and RapA upon  
87 their association. Based on the structural findings and the results of DNA binding assays, we  
88 propose that RapA functions in RNAP recycling by acting as a guardian; RapA prevents the non-  
89 specific association of the post-transcription terminated RNAP with DNA without obstructing  $\sigma$   
90 factor binding to core enzyme (holoenzyme formation) and primes it for a next round of  
91 transcription cycle.

92

93 **RESULTS AND DISCUSSION**

## 94 **Cryo-EM structure of the EC-RapA complex**

95 EC-RapA was reconstituted *in vitro* by mixing RNAP with a DNA/RNA scaffold (Fig. 1B)  
96 to form the EC followed by adding RapA. The complex was cross-linked with BS3 and purified  
97 by gel filtration column. Cryo-EM data were collected after vitrifying purified complex  
98 supplemented with AMPPNP (a non-hydrolysable ATP analog) to capture ATP-bound state of  
99 RapA, and CMPCPP (a non-hydrolysable analog of CTP) to prevent RNAP backtracking.  
100 Unsupervised 3D classification of the particles in the processing steps revealed two distinct classes  
101 (SFig. 2) including EC-RapA (class2, 10%) and EC (class4, 36%). Bayesian polishing of particles  
102 gave final reconstructions of EC-RapA and EC at 3.3 Å and 3.15 Å resolutions, respectively.

103 The EC-RapA structure shows well-defined cryo-EM densities for RNAP (except  $\omega$   
104 subunit), RapA and the nucleic acid scaffold (Fig. 1C, SMovie 1). It also shows the density for  
105 CMPCPP at *i*+1 site of RNAP (SFig. 3A), but AMPPNP was not found in the RapA active site  
106 (SFig. 3B). RapA binds near the RNA exit channel of RNAP (Fig. 1D) as observed in the X-ray  
107 crystal structure of EC-RapA (SFigs. 1D) (43). Nonetheless, the cryo-EM structure of EC-RapA  
108 revealed the RNAP-induced conformational changes of RapA including the N-terminal domain  
109 (NTD, residues 1-109) and the ATP binding site compared to its apo-form (42) (Figs. 1E and F).  
110 The RapA-NTD rotates 90 degree and swings away from the Lobe 1 domain (Fig. 1E). The NTD  
111 rotation, together with the Lobe 1 domain creates a cavity that harbors the flap-tip helix ( $\beta$   
112 subunit:897-905) and the zinc binding domain (ZBD,  $\beta'$  subunit:70-88) of RNAP. The RapA-NTD  
113 rotation may influence the conformation of RapA active site allosterically; motif V of the Lobe 2  
114 domain moves down toward a Lobe 2 helix (residues 540-553) compared with its position in the  
115 apo-form RapA (Fig. 1F). The spatial rearrangement of motif V, in turn, may facilitate better  
116 diffusion of ATP into the active site of RapA. NTD is involved in the regulation of ATPase activity  
117 of RapA. The ATPase activity of RapA derivative lacking NTD is five-fold higher than that of  
118 wild-type RapA. The ATPase activity of RapA is also enhanced upon binding to RNAP (44). The  
119 cryo-EM structure of EC-RapA elucidates a mechanism of enhancing ATPase activity of RapA  
120 upon binding of RNAP by which moving RapA-NTD from the Lobe 1 domain to widen the ATP  
121 binding site of RapA. Moreover, we propose a potential auto-inhibitory function of RapA-NTD;  
122 prior to binding RNAP, the RapA-NTD resides close to the catalytic lobe domains and may prevent  
123 non-specific ATP binding and hydrolysis.

124

125 **RapA constraints non-specific association of RNAP core enzyme with DNA**

126 HelD in *Bacillus subtilis* and *Mycobacterium smegmatis* is the functional counterpart of  
127 RapA in *E. coli*; these ATP-dependent motor enzymes bind RNAP and facilitate RNAP recycling.  
128 Recent structural studies of the RNAP-HelD complex revealed that HelD associates with the main  
129 and the secondary channels of RNAP and opens the DNA binding main channel of EC to actively  
130 dissociate DNA/RNA from the EC (21,30,31). In sharp contrast, RapA accesses neither the main  
131 nor the secondary channels of RNAP but associates on the RNA exit channel of RNAP, and the  
132 RapA binding does not induce conformational change of EC, suggesting that the RapA does not  
133 dissociate DNA/RNA from the EC and it exploits an alternative mechanism to prevent the PTC  
134 formation and facilitates RNAP recycling.

135 A recent single-molecule study on transcription termination revealed that after RNA  
136 transcript release from EC, majority of RNAP remain bound on DNA and exhibit one-dimensional  
137 sliding over thousands of base pairs (45,46). Non-specific association of RNAP core enzyme with  
138 DNA hampers RNAP recycling and delays a next round of transcription. We, therefore,  
139 hypothesized that the RapA may function as a guardian of RNAP core enzyme for preventing the  
140 PTC formation by which reduces non-specific binding of RNAP with DNA.

141 To test this hypothesis, we performed electrophoretic mobility shift assay (EMSA) using a  
142 fluorophore (Cy3)-labeled DNA (Fig. 2A) and quantitated the fraction of DNA bound to RNAP.  
143 About 60 % of DNA was associated with RNAP in the absence of RapA (Figs. 2B and C). Addition  
144 of RapA to RNAP reduced the formation of RNAP-DNA complex by ~2.5 fold. Supplementing  
145 ATP to RapA had no effect on the RNAP and DNA association. RapA did not reduce the RNAP-  
146 DNA complex if it was added to the pre-formed RNAP-DNA complex even in the presence of  
147 ATP. These results support our hypothesis that RapA reduces non-specific association of RNAP  
148 with DNA.

149

150 **Allosteric closure of RNAP clamp by RapA-NTD interaction with the zinc binding domain**  
151 **of RNAP**

152 RNAP structure resembles a crab claw, with the  $\beta$  and  $\beta'$  subunits forming two “pincers”  
153 that forms the main channel of RNAP serving the binding site for DNA (47). The pincer formed  
154 by the  $\beta'$  subunit is also known as the “clamp”. Structural and biophysical studies of bacterial  
155 RNAP revealed flexible nature of the clamp, which can acquire different conformations from an

156 “open” to a “closed” states (48,49). The clamp primarily remains in its “open” conformation in the  
157 apo-form RNAP core enzyme, but it closes upon formation of EC with DNA/RNA scaffold  
158 accommodated in the main channel. The clamp opening permits the entry of double-stranded DNA  
159 and/or DNA/RNA hybrid inside the main channel of RNAP. Although RapA binds around the  
160 RNA exit channel of RNAP, it may close the RNAP clamp allosterically and prevent non-specific  
161 DNA binding to RNAP. To study how the RapA influences the RNAP clamp conformation, we  
162 determined the cryo-EM structures of the RNAP core enzyme (SFig. 4) and RNAP-RapA binary  
163 complex (SFig. 5) at nominal resolutions of 3.41 Å and 4.8 Å, respectively.

164 In the structure of RNAP core enzyme, the main channel is in an open conformation with  
165 the  $\beta'$  clamp and  $\beta$  lobe being 39 Å apart (Fig. 3A, SMovie 2). In the structure of RNAP-RapA  
166 binary complex, the main channel is closed with the  $\beta'$  clamp and  $\beta$  lobe distance of 23 Å (Fig.  
167 3A, SMovie 2) as observed in the cryo-EM structures of EC (24 Å) and EC-RapA (24 Å)  
168 determined in this study.

169 The clamp closure of the RNAP-RapA binary complex is due to the positioning of RapA-  
170 NTD beside the zinc binding domain (ZBD) of the  $\beta'$  subunit (Fig. 3B), which is a pivot point of  
171 the  $\beta'$  clamp. Physical contact between RapA-NTD and  $\beta'$ -ZBD may restrict the flexibility of  
172 ZBD, and in turn, keeps the clamp in a closed state allosterically.

173

#### 174 **Model for RapA-mediated RNAP recycling**

175 The binding site of RapA on RNAP overlaps with that of the transcription elongation factor  
176 NusA (50) and are thought to be mutually exclusive (SFig. 6). Therefore, RapA is unable to access  
177 RNAP during the elongation phase of transcription. We posit that RapA prevents the detrimental  
178 effects of RNAP bound at non-specific DNA by acting as a recycling chaperone that binds RNAP  
179 core enzyme immediately after its release from DNA and RNA (Fig. 4). Upon RapA binding, it  
180 allosterically locks the RNAP in a closed clamp conformation and prevents its non-specific  
181 association with DNA. Moreover, as RapA binding site on RNAP does not mask the coiled-coiled  
182 (CC) domain of the  $\beta'$  subunit of RNAP (Fig. 1D), the complex can still bind  $\sigma$  factor.

183 Both RapA and HelD enhance transcription by facilitating the RNAP recycling using  
184 distinct mechanisms. RapA recycles in a passive manner by allosterically closing the clamp of  
185 RNAP core enzyme, while HelD participates by interacting with the main channel of ECs, utilizing  
186 ATP energy and recycling RNAP. From bacterial genome sequence analysis, we found that

187 presence of RapA and HelD is mutually exclusive with the former being predominantly present in  
188 proteobacteria whereas the latter is mostly present in firmicutes and actinobacteria (SFig. 7). This  
189 indicates that two different RNAP recycling mechanisms may have occurred during evolution.  
190 RapA cannot actively release DNA/RNA from EC, however, in *E. coli*, the transcription-repair  
191 coupling factor Mfd rescues EC stalled at DNA lesions and recruits the nucleotide excision repair  
192 (NER) machinery to the site of the damage (19). Binding of Mfd to the  $\beta$  subunit of stalled RNAP  
193 and upstream DNA of the transcription bubble (51,52) triggers its translocase activity (53). Mfd  
194 actively translocates along dsDNA and results in the collapse of the transcription bubble and  
195 dissociation of RNAP from the EC (54). Mfd-mediated active dissociation of RNAP may provide  
196 another safeguard to rescue RNAP that are bound non-specifically on DNA.

197 In summary, we propose that RapA functions as a guardian of RNAP after completion of  
198 RNA synthesis and releasing DNA from RNAP core enzyme, which is then protected by RapA for  
199 reducing its non-specific DNA binding. Binding of  $\sigma$  factor to the RNAP-RapA binary complex  
200 competes out RapA (42) and the new-formed holoenzyme is ready to begin the next round of  
201 transcription cycle.

202

## 203 **MATERIALS AND METHODS**

### 204 **Protein purifications**

205 *E. coli* RNAP core enzyme was overexpressed in *E. coli* BL21(DE3) cells transformed  
206 with pVS10 expression vector (encoding  $\alpha$ ,  $\beta$ , C-terminally His<sub>6</sub>-tagged  $\beta'$  and  $\omega$  subunits) (55)  
207 and grown in LB medium supplemented with ampicillin (100  $\mu$ g/ml) at 37°C until OD<sub>600</sub> = ~0.5,  
208 and then added IPTG (final conc. 1 mM) and grown for 5 hours. RNAP enzyme was purified using  
209 Polymin P precipitation followed by heparin (HiTrap Heparin column), Ni-affinity (HisTrap HP  
210 column), and anion exchange (MonoQ column) chromatography steps (all columns from GE  
211 Healthcare). The purified RNAP core enzyme (20  $\mu$ M) was suspended in the storage buffer (10  
212 mM HEPES, pH 7.5, 50 mM NaCl, 0.1 mM EDTA, pH 8.0, 5 mM DTT), aliquoted, snap frozen  
213 in liquid N<sub>2</sub>, and stored at -80 °C.

214 *E. coli* RapA protein was overexpressed in *E. coli* BL21(DE3) cells transformed with  
215 pQE80L expression vector (encoding N-terminally His<sub>6</sub>-tagged full-length RapA) and grown in  
216 LB medium supplemented with ampicillin at 37°C till OD<sub>600</sub>=0.8. Then the RapA expression was  
217 induced with IPTG (final conc. 1 mM) at 37 °C for 3 hours and harvested (42). The protein was

218 purified by affinity and size-exclusion chromatography using prepacked 5 ml Ni-affinity (HisTrap  
219 HP column), 5 ml heparin (HiTrap Heparin column), and Superdex200 columns (all columns from  
220 GE Healthcare). The purified RapA (230 $\mu$ M) in storage buffer (10 mM HEPES, pH 7.5, 50 mM  
221 NaCl, 0.1 mM EDTA, pH 8.0, 5 mM DTT) was aliquoted, flash frozen in liquid N<sub>2</sub>, and stored at  
222 -80 °C.

223

## 224 **Cryo-EM sample preparation**

### 225 *EC-RapA:*

226 The EC was reconstituted *in vitro* by mixing 4  $\mu$ M RNAP core enzyme with equimolar  
227 amount of template DNA/RNA (Fig. 2A) in a storage buffer at 22 °C for 20 min, followed by  
228 mixing 6  $\mu$ M non-template DNA for 10 min. The resulting EC was mixed with 5  $\mu$ M RapA and  
229 incubated for 10 min at 22 °C. The EC-RapA complex was purified by a gel-filtration column  
230 (Superdex200, GE Healthcare) to remove excess DNA/RNA and RapA. The EC-RapA was  
231 concentrated to 4 mg/ml using Amicon Ultra centrifugal filter with 5kDa molecular weight cutoff  
232 (Merck Millipore). AMPPNP and CMPCPP (1 mM each) was added and incubated at 22 °C for  
233 10 min, followed by BS3 (Sulfo DSS, 100 $\mu$ M) cross-linking for 30 minutes at RT and reaction  
234 was stopped by adding ammonium carbonate (1 M). The cross-linked EC-RapA was again passed  
235 through a gel-filtration column (Superdex 200, GE Healthcare) and concentrated to 2.5 mg/ml.

236

### 237 *RNAP-RapA binary complex:*

238 The RNAP-RapA binary complex was assembled and purified in an identical fashion as  
239 the EC-RapA complex but omitting the nucleic acid scaffold and the nucleotide analogs. In brief,  
240 4  $\mu$ M RNAP was mixed with 5  $\mu$ M RapA in a storage buffer and incubated for 10 min at 22 °C.  
241 The RNAP-RapA complex was pass through a gel-filtration column (Superdex200, GE  
242 Healthcare) to remove excess RapA. The RNAP-RapA complex was concentrated to 2.5 mg/ml  
243 using Amicon Ultra centrifugal filter with 5kDa molecular weight cutoff (Merck Millipore).

244

## 245 **Cryo-EM grids preparation**

246 C-flat Cu grids (CF-1.2/1.3 400 mesh, Protochips, Morrisville, NC) were glow-discharged  
247 for 40 s prior to the application of 3.5  $\mu$ l of the sample (2.5–3.0 mg/ml protein concentration), and



248 plunge-freezing in liquid ethane using a Vitrobot Mark IV (FEI, Hillsboro, OR) with 100 %  
249 chamber humidity at 5 °C.

250

## 251 **Cryo-EM data acquisition and processing**

### 252 *EC-RapA:*

253 The grids were imaged using a 300 kV Titan Krios (Thermo Fisher Scientific) equipped  
254 with a K2-Summit direct electron detector at the National Cryo-EM Facility (NCEF) at National  
255 Cancer Institute (NCI). A total of 1,674 movies were recorded with Latitude software (Gatan, Inc.)  
256 in counting mode with a pixel size of 1.32 Å and a defocus range of -1.0 to -2.5 µm. Data was  
257 collected with a dose of 4.64 e<sup>-</sup>/s/physical pixel, with 15 sec exposure time (40 total frames) to  
258 give a total dose of 40 electrons/Å<sup>2</sup>. Data was processed using RELION v3.0.8. Dose fractionated  
259 subframes were aligned and summed using MotionCor2 (56). The contrast transfer function was  
260 estimated for each summed image using Gctf (57). From the summed images, about 1,000 particles  
261 were manually picked and subjected to 2D classification in RELION (58). Projection averages of  
262 the most populated classes were used as templates for automated picking in RELION. Auto picked  
263 particles were manually inspected, then subjected to 2D classification in RELION specifying 100  
264 classes. Poorly populated classes were removed, resulting in a total of 718,074 particles. 3D-  
265 classification of the particles was done in RELION using a model of *E. coli* core RNAP-RapA  
266 (PDB ID 4S20) low-pass filtered to 60 Å resolution using EMAN2 (59) as an initial 3D template.  
267 Among the 3D classes, the best-resolved classes (class2: 69,457 particles) and class4: 256,565  
268 particles) were 3D auto-refined. Bayesian polishing and CTF refinement was performed on the  
269 particles and reconstructed maps were postprocessed in RELION (SFig. 2).

270

### 271 *Core RNAP:*

272 The grids were imaged using a 300 kV Titan Krios (Thermo Fisher Scientific) equipped  
273 with a K3 Camera at NCI. A total of 3,072 movies were recorded with Latitude software (Gatan,  
274 Inc.) in counting mode with a pixel size of 1.08 Å and a defocus range of -1.0 to -2.5 µm. Data  
275 was collected with a dose of 18 e<sup>-</sup>/s/physical pixel, with 3 sec exposure time (40 total frames) to  
276 give a total dose of 45 electrons/Å<sup>2</sup>. The data was processed using cryoSPARC (60). Dose  
277 fractionated subframes were aligned and summed using Patch-Motion correction job and the  
278 contrast transfer function was estimated for each summed image using Patch-CTF. A total of

279 766,796 particles were auto picked using Topaz picker (61), and then subjected to two rounds of  
280 2D classification. Bad classes were removed, resulting in a total of 510,364 particles. Ab-initio  
281 model was generated, and the particles were subjected to multiple rounds of heterogeneous  
282 refinement. A final set of 235617 particles was refined and the reconstructed map was sharpened  
283 (SFig. 4).

284

#### 285 *RNAP-RapA binary complex:*

286 The grids were imaged using a 300 keV Titan Krios (Thermo Fisher Scientific) equipped  
287 with a K3 Camera (Gatan, Inc.) at NCI. A total of 3,504 movies were recorded with Latitude  
288 software (Gatan, Inc.) in counting mode with a pixel size of 1.08 Å and a defocus range of -1.0 to  
289 -2.5 µm. Data was collected with a total dose of 45 electrons/Å<sup>2</sup>. Movies were motion corrected  
290 using multi-patch motion correction and CTF values estimated using multi-patch CTF estimation  
291 in cryoSPARC (60). A total of 1,360,137 particles were auto picked using Topaz picker (61) and  
292 subjected to 2D classification job. Particles from selected good classes were used to generate initial  
293 models. All the particles were then further classified multiple times using heterogeneous  
294 refinement job-type to discard bad particles. A final set of 102,128 particles were then imported to  
295 RELION. To improve the density near the β lobe, focused classification was performed on RNAP  
296 density. The good class containing 88,511 particles was selected, and the particles were refined  
297 and post-processed (SFig. 5).

298

#### 299 **Model building and refinement**

300 To refine the EC-RapA complex structure, the crystal structure of EC-RapA (PDB: 4S20)  
301 was manually fit into the cryo-EM density map using Chimera (62), DNA and RNA were manually  
302 built by using Coot (63), and the initial model was real-space refined using Phenix (64). In the  
303 real-space refinement, the domains of RNAP and RapA were rigid-body refined and then  
304 subsequently refined with secondary structure, Ramachandran, rotamer and reference model  
305 restraints. The cryo-EM structures of the RNAP-RapA binary complex, RNAP core enzyme and  
306 RNAP-DNA-RapA complex were built using the cryo-EM structure of EC-RapA as a reference  
307 model, and these structures were refined as described in the EC-RapA complex structure  
308 refinement (STable 1).

309

## 310 **Electrophoretic Mobility Shift Assay**

311 A linear Cy3-labeled dsDNA was generated by annealing the template and non-template  
312 strands by heating to 95 °C for 5 min and subsequent cooling to 10 °C at 1.5 °C/min (Fig. 3A). A  
313 final concentration of 150 nM Cy3-dsDNA was incubated with 300 nM RNAP for 10 minutes at  
314 37 °C, followed by the addition of 300 nM RapA (either in the absence or presence of 1 mM ATP)  
315 and incubated for another 10 minutes (Fig. 3B, lanes 4-6). In the experimental set, first RNAP-  
316 RapA complex was formed by mixing 300 nM RNAP and 300 nM RapA (with/without 1 mM  
317 ATP), followed by incubation for 10 minutes at 37 °C. Then, 150 nM Cy3-dsDNA was added to  
318 the pre-formed complex, and further incubated for 10 minutes at 37 °C. Samples were loaded on  
319 a non-denaturing 4% polyacrylamide gel and electrophoresed in 0.5X TBE buffer. The Cy3-  
320 labeled DNA bands were visualized by a Typhoon imager and quantified using ImageQuant  
321 software (GE Healthcare).

322

323 **Data Availability.** The cryo-EM density maps have been deposited in EMDataBank under  
324 accession codes EMDB: EMD-23900 (EC-RapA), EMD-23901 (EC), EMD-23902 (core RNAP)  
325 and EMD-23903 (RNAP-RapA). Atomic coordinates for the reported cryo-EM structures have  
326 been deposited with the Protein Data Bank under accession numbers 7KMN, 7KMO, 7KMP and  
327 7KMQ.

328

## 329 **SUPPLEMENTARY DATA**

330 This article contains supporting information.

331

## 332 **ACKNOWLEDGEMENTS**

333 We thank Dr. Irina Artsimovitch at Ohio State University and Dr. Ding J. Jin at the National Cancer  
334 Institute/National Institutes of Health for providing the RNAP and RapA expression vectors,  
335 respectively. We thank Rishi K Vishwarkarma, Libor Krásný and Jan Dohnálek for valuable  
336 discussions and critical reading of this manuscript. We thank Jean-Paul Armache at Penn State for  
337 the technical support. We thank Carol Bator and Mike Carnegie at the Penn State Cryo-EM facility  
338 for supporting the cryo-EM data collections.

339

## 340 **FUNDING AND ADDITIONAL INFORMATION**

341 This research was, in part, supported by the National Cancer Institute's National Cryo-EM Facility  
342 at the Frederick National Laboratory for Cancer Research under contract HSSN261200800001E.  
343 This work was supported by NIH grants (R01 GM087350 and R35 GM131860 for K.S.M.).

344

## 345 CONFLICT OF INTEREST

346 The authors declare that they have no conflicts of interest with the contents of this article.

347

## 348 REFERENCES

- 349 1. Condon, C., French, S., Squires, C., and Squires, C. L. (1993) Depletion of functional  
350 ribosomal RNA operons in *Escherichia coli* causes increased expression of the remaining  
351 intact copies. *The EMBO journal* **12**, 4305-4315
- 352 2. Conn, A. B., Diggs, S., Tam, T. K., and Blaha, G. M. (2019) Two Old Dogs, One New  
353 Trick: A Review of RNA Polymerase and Ribosome Interactions during Transcription-  
354 Translation Coupling. *Int J Mol Sci* **20**
- 355 3. Babitzke, P., Lai, Y. J., Renda, A. J., and Romeo, T. (2019) Posttranscription Initiation  
356 Control of Gene Expression Mediated by Bacterial RNA-Binding Proteins. *Annu Rev*  
357 *Microbiol* **73**, 43-67
- 358 4. Gusarov, I., and Nudler, E. (1999) The mechanism of intrinsic transcription termination.  
359 *Molecular cell* **3**, 495-504
- 360 5. Richardson, J. P. (2002) Rho-dependent termination and ATPases in transcript termination.  
361 *Biochim Biophys Acta* **1577**, 251-260
- 362 6. Santangelo, T. J., Mooney, R. A., Landick, R., and Roberts, J. W. (2003) RNA polymerase  
363 mutations that impair conversion to a termination-resistant complex by Q antiterminator  
364 proteins. *Genes & development* **17**, 1281-1292
- 365 7. Park, J. S., and Roberts, J. W. (2006) Role of DNA bubble rewinding in enzymatic  
366 transcription termination. *Proceedings of the National Academy of Sciences of the United*  
367 *States of America* **103**, 4870-4875
- 368 8. Howan, K., Monnet, J., Fan, J., and Strick, T. R. (2014) Stopped in its tracks: the RNA  
369 polymerase molecular motor as a robust sensor of DNA damage. *DNA Repair (Amst)* **20**,  
370 49-57
- 371 9. Farnham, P. J., Greenblatt, J., and Platt, T. (1982) Effects of NusA protein on transcription  
372 termination in the tryptophan operon of *Escherichia coli*. *Cell* **29**, 945-951
- 373 10. Schmidt, M. C., and Chamberlin, M. J. (1987) nusA protein of *Escherichia coli* is an  
374 efficient transcription termination factor for certain terminator sites. *Journal of molecular*  
375 *biology* **195**, 809-818
- 376 11. Sullivan, S. L., and Gottesman, M. E. (1992) Requirement for *E. coli* NusG protein in  
377 factor-dependent transcription termination. *Cell* **68**, 989-994
- 378 12. Li, J., Mason, S. W., and Greenblatt, J. (1993) Elongation factor NusG interacts with  
379 termination factor rho to regulate termination and antitermination of transcription. *Genes*  
380 *& development* **7**, 161-172

- 381 13. Mondal, S., Yakhnin, A. V., Sebastian, A., Albert, I., and Babitzke, P. (2016) NusA-  
382 dependent transcription termination prevents misregulation of global gene expression. *Nat*  
383 *Microbiol* **1**, 15007
- 384 14. Wang, C., Molodtsov, V., Firlar, E., Kaelber, J. T., Blaha, G., Su, M., and Ebright, R. H.  
385 (2020) Structural basis of transcription-translation coupling. *Science*
- 386 15. Komissarova, N., and Kashlev, M. (1997) RNA polymerase switches between inactivated  
387 and activated states By translocating back and forth along the DNA and the RNA. *The*  
388 *Journal of biological chemistry* **272**, 15329-15338
- 389 16. Nudler, E., Mustaev, A., Lukhtanov, E., and Goldfarb, A. (1997) The RNA-DNA hybrid  
390 maintains the register of transcription by preventing backtracking of RNA polymerase. *Cell*  
391 **89**, 33-41
- 392 17. Marr, M. T., and Roberts, J. W. (2000) Function of transcription cleavage factors GreA  
393 and GreB at a regulatory pause site. *Molecular cell* **6**, 1275-1285
- 394 18. Imashimizu, M., Takahashi, H., Oshima, T., McIntosh, C., Bubunencko, M., Court, D. L.,  
395 and Kashlev, M. (2015) Visualizing translocation dynamics and nascent transcript errors  
396 in paused RNA polymerases in vivo. *Genome Biol* **16**, 98
- 397 19. Selby, C. P., and Sancar, A. (1993) Molecular mechanism of transcription-repair coupling.  
398 *Science* **260**, 53-58
- 399 20. Savery, N. J. (2007) The molecular mechanism of transcription-coupled DNA repair.  
400 *Trends Microbiol* **15**, 326-333
- 401 21. Kang, J. Y., Llewellyn, E., Chen, J., Olinares, P. D. B., Brewer, J., Chait, B. T., Campbell,  
402 E. A., and Darst, S. A. (2021) Structural basis for transcription complex disruption by the  
403 Mfd translocase. *Elife* **10**
- 404 22. Sikova, M., Wiedermannova, J., Prevorovsky, M., Barvik, I., Sudzinova, P., Kofronova,  
405 O., Benada, O., Sanderova, H., Condon, C., and Krasny, L. (2020) The torpedo effect in  
406 *Bacillus subtilis*: RNase J1 resolves stalled transcription complexes. *The EMBO journal*  
407 **39**, e102500
- 408 23. Kalyani, B. S., Muteeb, G., Qayyum, M. Z., and Sen, R. (2011) Interaction with the nascent  
409 RNA is a prerequisite for the recruitment of Rho to the transcription elongation complex  
410 in vitro. *Journal of molecular biology* **413**, 548-560
- 411 24. Shashni, R., Qayyum, M. Z., Vishalini, V., Dey, D., and Sen, R. (2014) Redundancy of  
412 primary RNA-binding functions of the bacterial transcription terminator Rho. *Nucleic*  
413 *acids research* **42**, 9677-9690
- 414 25. Peters, J. M., Vangeloff, A. D., and Landick, R. (2011) Bacterial transcription terminators:  
415 the RNA 3'-end chronicles. *Journal of molecular biology* **412**, 793-813
- 416 26. Said, N., Hilal, T., Sunday, N. D., Khatri, A., Burger, J., Mielke, T., Belogurov, G. A.,  
417 Loll, B., Sen, R., Artsimovitch, I., and Wahl, M. C. (2021) Steps toward translocation-  
418 independent RNA polymerase inactivation by terminator ATPase rho. *Science* **371**
- 419 27. Jin, D. J., Zhou, Y. N., Shaw, G., and Ji, X. (2011) Structure and function of RapA: a  
420 bacterial Swi2/Snf2 protein required for RNA polymerase recycling in transcription.  
421 *Biochim Biophys Acta* **1809**, 470-475
- 422 28. Wiedermannova, J., Sudzinova, P., Koval, T., Rabatinova, A., Sanderova, H., Ramaniuk,  
423 O., Rittich, S., Dohnalek, J., Fu, Z., Halada, P., Lewis, P., and Krasny, L. (2014)  
424 Characterization of HelD, an interacting partner of RNA polymerase from *Bacillus subtilis*.  
425 *Nucleic acids research* **42**, 5151-5163

- 426 29. Kouba, T., Koval, T., Sudzinova, P., Pospisil, J., Brezovska, B., Hnilicova, J., Sanderova,  
427 H., Janouskova, M., Sikova, M., Halada, P., Sykora, M., Barvik, I., Novacek, J., Trundova,  
428 M., Duskova, J., Skalova, T., Chon, U., Murakami, K. S., Dohnalek, J., and Krasny, L.  
429 (2020) Mycobacterial HelD is a nucleic acids-clearing factor for RNA polymerase. *Nat*  
430 *Commun* **11**, 6419
- 431 30. Newing, T. P., Oakley, A. J., Miller, M., Dawson, C. J., Brown, S. H. J., Bouwer, J. C.,  
432 Tolun, G., and Lewis, P. J. (2020) Molecular basis for RNA polymerase-dependent  
433 transcription complex recycling by the helicase-like motor protein HelD. *Nat Commun* **11**,  
434 6420
- 435 31. Pei, H. H., Hilal, T., Chen, Z. A., Huang, Y. H., Gao, Y., Said, N., Loll, B., Rappsilber, J.,  
436 Belogurov, G. A., Artsimovitch, I., and Wahl, M. C. (2020) The delta subunit and NTPase  
437 HelD institute a two-pronged mechanism for RNA polymerase recycling. *Nat Commun* **11**,  
438 6418
- 439 32. Flaus, A., Martin, D. M., Barton, G. J., and Owen-Hughes, T. (2006) Identification of  
440 multiple distinct Snf2 subfamilies with conserved structural motifs. *Nucleic acids research*  
441 **34**, 2887-2905
- 442 33. Burgess, R. R., Travers, A. A., Dunn, J. J., and Bautz, E. K. (1969) Factor stimulating  
443 transcription by RNA polymerase. *Nature* **221**, 43-46
- 444 34. Owen-Hughes, T., Utley, R. T., Cote, J., Peterson, C. L., and Workman, J. L. (1996)  
445 Persistent site-specific remodeling of a nucleosome array by transient action of the  
446 SWI/SNF complex. *Science* **273**, 513-516
- 447 35. Sukhodolets, M. V., Cabrera, J. E., Zhi, H., and Jin, D. J. (2001) RapA, a bacterial homolog  
448 of SWI2/SNF2, stimulates RNA polymerase recycling in transcription. *Genes &*  
449 *development* **15**, 3330-3341
- 450 36. McKinley, B. A., and Sukhodolets, M. V. (2007) Escherichia coli RNA polymerase-  
451 associated SWI/SNF protein RapA: evidence for RNA-directed binding and remodeling  
452 activity. *Nucleic acids research* **35**, 7044-7060
- 453 37. Richmond, M., Pasupula, R. R., Kansara, S. G., Autery, J. P., Monk, B. M., and  
454 Sukhodolets, M. V. (2011) RapA, Escherichia coli RNA polymerase SWI/SNF subunit-  
455 dependent polyadenylation of RNA. *Biochemistry* **50**, 2298-2312
- 456 38. Sukhodolets, M. V., and Jin, D. J. (1998) RapA, a novel RNA polymerase-associated  
457 protein, is a bacterial homolog of SWI2/SNF2. *The Journal of biological chemistry* **273**,  
458 7018-7023
- 459 39. Sukhodolets, M. V., and Jin, D. J. (2000) Interaction between RNA polymerase and RapA,  
460 a bacterial homolog of the SWI/SNF protein family. *The Journal of biological chemistry*  
461 **275**, 22090-22097
- 462 40. Yawn, B., Zhang, L., Mura, C., and Sukhodolets, M. V. (2009) RapA, the SWI/SNF  
463 subunit of Escherichia coli RNA polymerase, promotes the release of nascent RNA from  
464 transcription complexes. *Biochemistry* **48**, 7794-7806
- 465 41. Muzzin, O., Campbell, E. A., Xia, L., Severinova, E., Darst, S. A., and Severinov, K.  
466 (1998) Disruption of Escherichia coli hepA, an RNA polymerase-associated protein,  
467 causes UV sensitivity. *The Journal of biological chemistry* **273**, 15157-15161
- 468 42. Shaw, G., Gan, J., Zhou, Y. N., Zhi, H., Subburaman, P., Zhang, R., Joachimiak, A., Jin,  
469 D. J., and Ji, X. (2008) Structure of RapA, a Swi2/Snf2 protein that recycles RNA  
470 polymerase during transcription. *Structure* **16**, 1417-1427

- 471 43. Liu, B., Zuo, Y., and Steitz, T. A. (2015) Structural basis for transcription reactivation by  
472 RapA. *Proceedings of the National Academy of Sciences of the United States of America*  
473 **112**, 2006-2010
- 474 44. Kakar, S., Fang, X., Lubkowska, L., Zhou, Y. N., Shaw, G. X., Wang, Y. X., Jin, D. J.,  
475 Kashlev, M., and Ji, X. (2015) Allosteric Activation of Bacterial Swi2/Snf2  
476 (Switch/Sucrose Non-fermentable) Protein RapA by RNA Polymerase: BIOCHEMICAL  
477 AND STRUCTURAL STUDIES. *J Biol Chem* **290**, 23656-23669
- 478 45. Kang, W., Ha, K. S., Uhm, H., Park, K., Lee, J. Y., Hohng, S., and Kang, C. (2020)  
479 Transcription reinitiation by recycling RNA polymerase that diffuses on DNA after  
480 releasing terminated RNA. *Nat Commun* **11**, 450
- 481 46. Harden, T. T., Herlambang, K. S., Chamberlain, M., Lalanne, J. B., Wells, C. D., Li, G.  
482 W., Landick, R., Hochschild, A., Kondev, J., and Gelles, J. (2020) Alternative transcription  
483 cycle for bacterial RNA polymerase. *Nat Commun* **11**, 448
- 484 47. Murakami, K. S., Masuda, S., and Darst, S. A. (2002) Structural basis of transcription  
485 initiation: RNA polymerase holoenzyme at 4 Å resolution. *Science* **296**, 1280-1284
- 486 48. Duchi, D., Mazumder, A., Malinen, A. M., Ebright, R. H., and Kapanidis, A. N. (2018)  
487 The RNA polymerase clamp interconverts dynamically among three states and is stabilized  
488 in a partly closed state by ppGpp. *Nucleic acids research* **46**, 7284-7295
- 489 49. Chakraborty, A., Wang, D., Ebright, Y. W., Korlann, Y., Kortkhonjia, E., Kim, T.,  
490 Chowdhury, S., Wigneshweraraj, S., Irschik, H., Jansen, R., Nixon, B. T., Knight, J.,  
491 Weiss, S., and Ebright, R. H. (2012) Opening and closing of the bacterial RNA polymerase  
492 clamp. *Science* **337**, 591-595
- 493 50. Guo, X., Myasnikov, A. G., Chen, J., Crucifix, C., Papai, G., Takacs, M., Schultz, P., and  
494 Weixlbaumer, A. (2018) Structural Basis for NusA Stabilized Transcriptional Pausing.  
495 *Molecular cell* **69**, 816-827 e814
- 496 51. Deaconescu, A. M., Chambers, A. L., Smith, A. J., Nickels, B. E., Hochschild, A., Savery,  
497 N. J., and Darst, S. A. (2006) Structural basis for bacterial transcription-coupled DNA  
498 repair. *Cell* **124**, 507-520
- 499 52. Park, J. S., Marr, M. T., and Roberts, J. W. (2002) E. coli Transcription repair coupling  
500 factor (Mfd protein) rescues arrested complexes by promoting forward translocation. *Cell*  
501 **109**, 757-767
- 502 53. Smith, A. J., Szczelkun, M. D., and Savery, N. J. (2007) Controlling the motor activity of  
503 a transcription-repair coupling factor: autoinhibition and the role of RNA polymerase.  
504 *Nucleic acids research* **35**, 1802-1811
- 505 54. Howan, K., Smith, A. J., Westblade, L. F., Joly, N., Grange, W., Zorman, S., Darst, S. A.,  
506 Savery, N. J., and Strick, T. R. (2012) Initiation of transcription-coupled repair  
507 characterized at single-molecule resolution. *Nature* **490**, 431-434
- 508 55. Svetlov, V., and Artsimovitch, I. (2015) Purification of bacterial RNA polymerase: tools  
509 and protocols. *Methods Mol Biol* **1276**, 13-29
- 510 56. Zheng, S. Q., Palovcak, E., Armache, J. P., Verba, K. A., Cheng, Y., and Agard, D. A.  
511 (2017) MotionCor2: anisotropic correction of beam-induced motion for improved cryo-  
512 electron microscopy. *Nat Methods* **14**, 331-332
- 513 57. Zhang, K. (2016) Gctf: Real-time CTF determination and correction. *J Struct Biol* **193**, 1-  
514 12

- 515 58. Zivanov, J., Nakane, T., Forsberg, B. O., Kimanius, D., Hagen, W. J., Lindahl, E., and  
516 Scheres, S. H. (2018) New tools for automated high-resolution cryo-EM structure  
517 determination in RELION-3. *Elife* **7**
- 518 59. Tang, G., Peng, L., Baldwin, P. R., Mann, D. S., Jiang, W., Rees, I., and Ludtke, S. J.  
519 (2007) EMAN2: an extensible image processing suite for electron microscopy. *J Struct*  
520 *Biol* **157**, 38-46
- 521 60. Punjani, A., Rubinstein, J. L., Fleet, D. J., and Brubaker, M. A. (2017) cryoSPARC:  
522 algorithms for rapid unsupervised cryo-EM structure determination. *Nat Methods* **14**, 290-  
523 296
- 524 61. Bepler, T., Morin, A., Rapp, M., Brasch, J., Shapiro, L., Noble, A. J., and Berger, B. (2019)  
525 Positive-unlabeled convolutional neural networks for particle picking in cryo-electron  
526 micrographs. *Nat Methods* **16**, 1153-1160
- 527 62. Pettersen, E. F., Goddard, T. D., Huang, C. C., Couch, G. S., Greenblatt, D. M., Meng, E.  
528 C., and Ferrin, T. E. (2004) UCSF Chimera--a visualization system for exploratory research  
529 and analysis. *J Comput Chem* **25**, 1605-1612
- 530 63. Emsley, P., and Cowtan, K. (2004) Coot: model-building tools for molecular graphics. *Acta*  
531 *Crystallogr D Biol Crystallogr* **60**, 2126-2132
- 532 64. Afonine, P. V., Mustyakimov, M., Grosse-Kunstleve, R. W., Moriarty, N. W., Langan, P.,  
533 and Adams, P. D. (2010) Joint X-ray and neutron refinement with phenix.refine. *Acta*  
534 *Crystallogr D Biol Crystallogr* **66**, 1153-1163

535

536



537 **FIGURES**

538

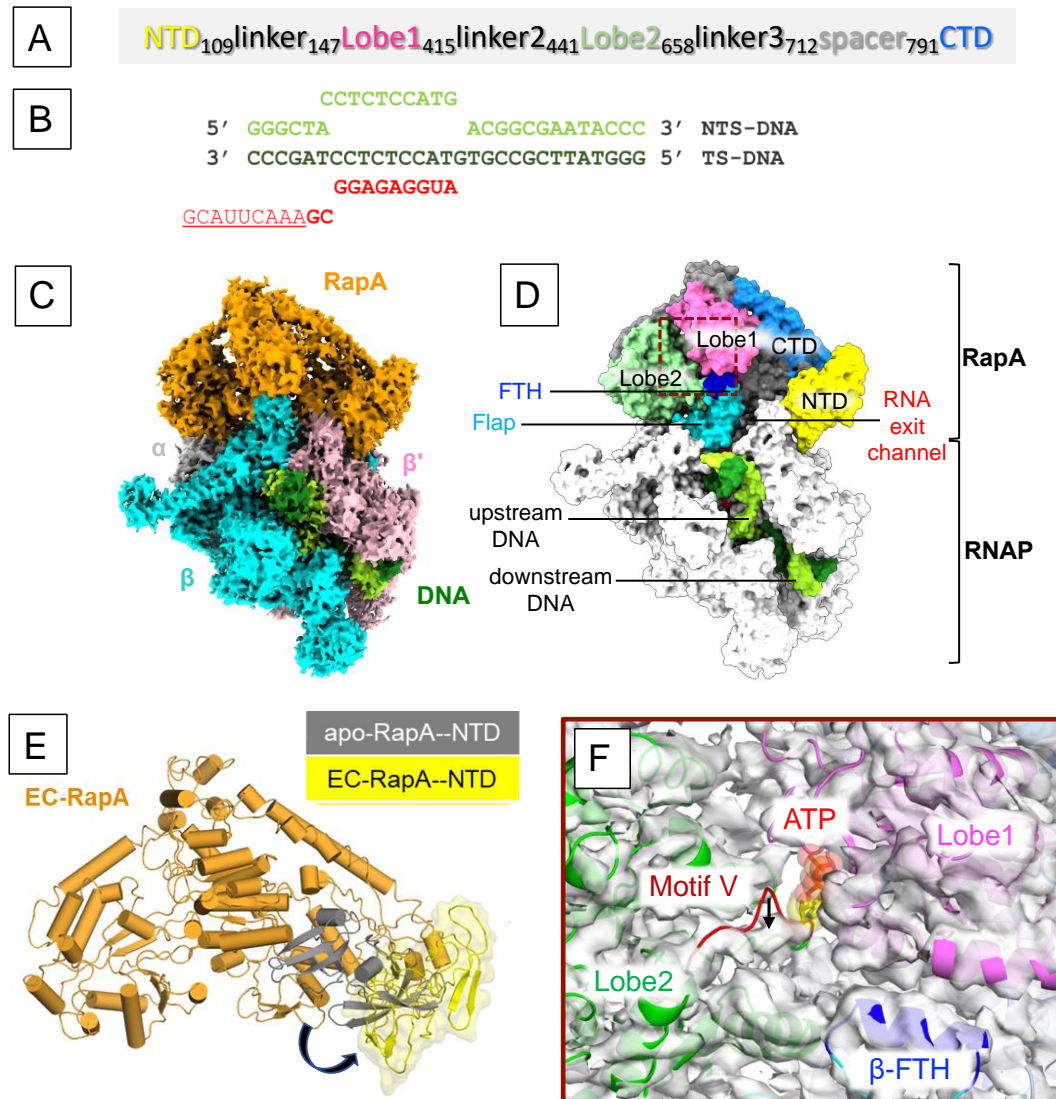

539

540 **Figure 1. Cryo-EM structure of the RNAP-RapA elongation complex**

541 **A)** The domain organization of RapA.

542 **B)** The sequence of the nucleic acid scaffold used to form the elongation complex.

543 **C)** Orthogonal view of the cryo-EM density map of EC-RapA. Subunits of RNAP and RapA are  
 544 colored and labeled. Template and non-template DNA are shown in dark green and light green,  
 545 respectively.

546 **D)** Organization of EC-Rap. The structure of EC-RapA is depicted as a surface model. RapA and  
 547 RNAP domains and are colored and labeled (FTH, flap-tip helix). The location of upstream and  
 548 downstream DNA and the RNA exit channel are indicated.

549 **E)** Movement of RapA-NTD upon binding to RNAP. RapA is depicted as a cartoon model. RapA-  
550 NTD in the EC-RapA (this study) and in the apo-form RapA (PDB: 6BOG) are colored yellow  
551 and dark gray, respectively. The shift of RapA-NTD is indicated by an arrow.

552 **F)** Allosteric opening of the ATP binding site of RapA upon RNAP binding (brown dashed box in  
553 panel D). The apo-form RapA structure (cartoon model) fitted in the cryo-EM map of EC-RapA  
554 (white transparent). The Lobe domains of RapA are colored and labeled and the ATP binding is  
555 indicated by a modeled ATP. Compare with the apo-form RapA, motif V of the Lobe2 domain is  
556 shifted down in the EC-RapA complex as indicated by an arrow.

557

A

5' -GGGCGCATGCTGCTCTAGGAGAGGTACACGGCGACTGCC -3'  
3' -CCCGGTACGACGAGATCCTCTCCATGTGCCGACAGCGG -Cy3-5'

B

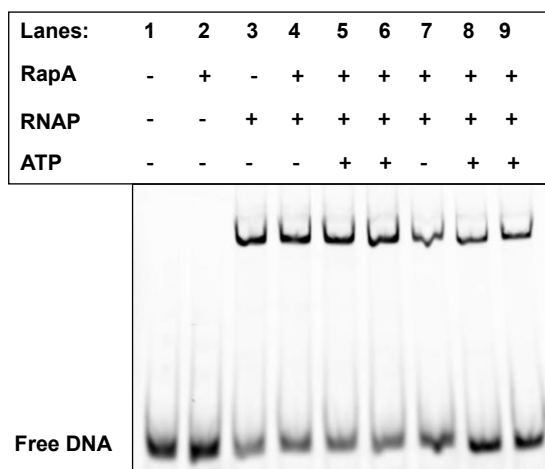

C

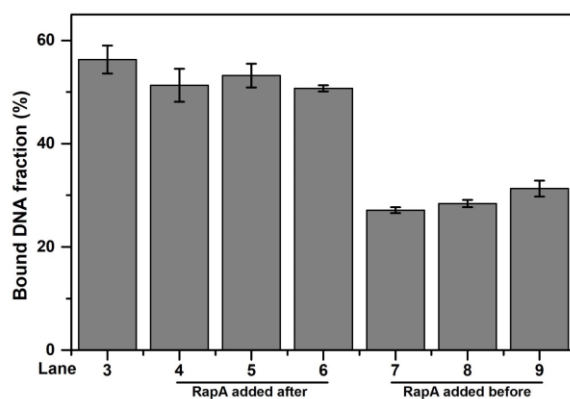

558  
559 **Figure 2. RapA reduces non-specific DNA binding of RNAP core enzyme.** Electrophoretic  
560 Mobility Shift Assay (EMSA) to test the non-specific DNA binding to RNAP in the absence and  
561 presence of RapA. **A)** The sequence of Cy3-DNA used in the assay. **B)** RNAP was mixed with  
562 Cy3-labeled DNA and the shift DNA bands were quantitated. + indicated the components in the  
563 reaction mixture. In lanes 4-6, RapA was added to pre-formed RNAP-DNA complex. In lanes 7-  
564 9, DNA was added to pre-formed RNAP-RapA complex. In lanes 5 and 8, 1 mM ATP was added  
565 together with RapA. In lanes 6 and 9, RapA was pre-incubated with 1 mM ATP for 10 minutes  
566 before addition. **C)** Bar diagram showing the fraction of bound DNA (%) calculated with S.E.,  
567 n=4.  
568  
569

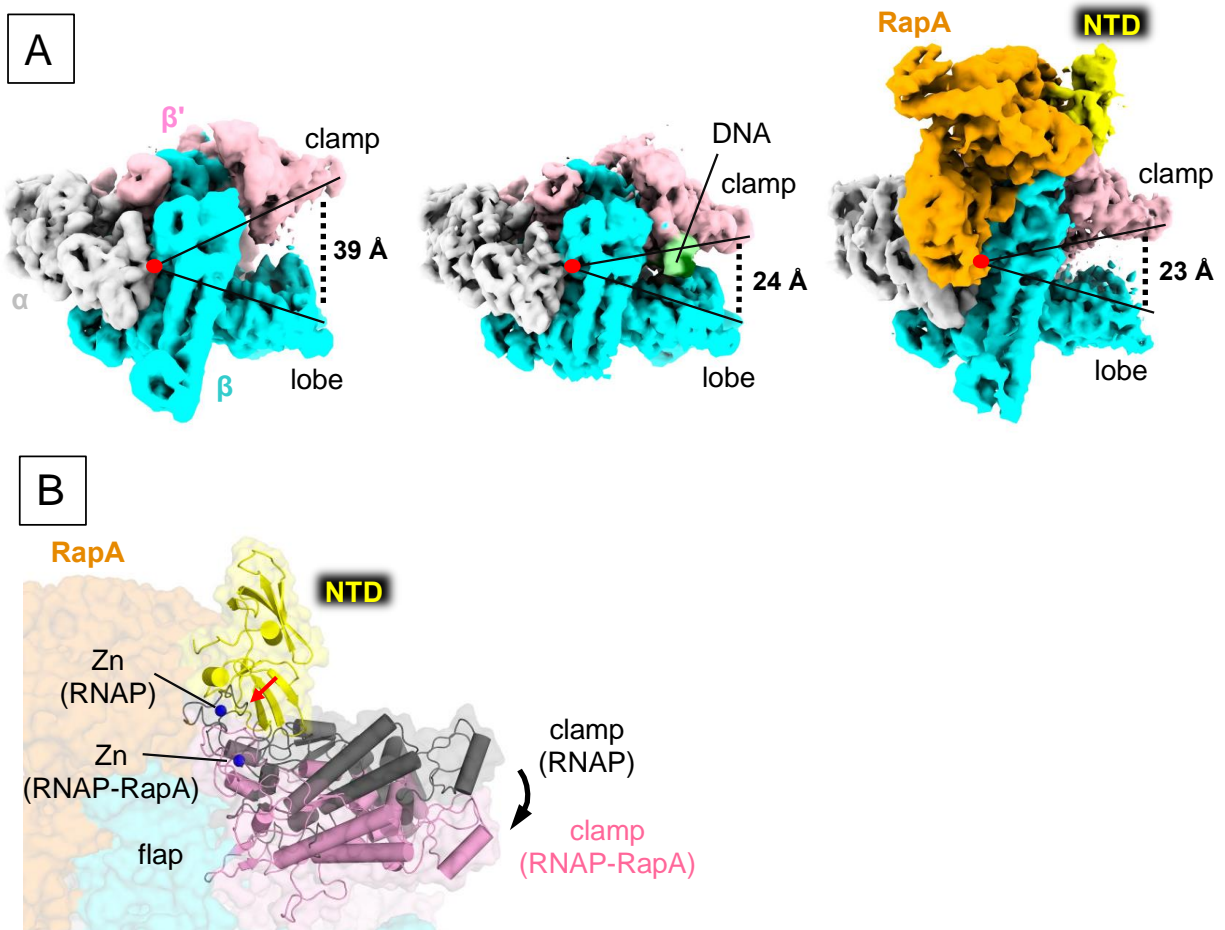

570

571 **Figure 3. Cryo-EM structures of the RNAP core enzyme and the RNAP-RapA binary**  
572 **complex**

573 **A)** Cryo-EM density maps of RNAP core enzyme (left), EC (middle) and RNAP-RapA (right).  
574 RNAP subunits and RapA are colored and labeled. RNAP domains and DNA are indicated.  
575 Opened and closed states of the RNAP clamp are represented by acute-angled lines and distances  
576 between the clamp and lobe domains of RNAP are indicated.

577 **B)** RapA-mediated clamp closure. The RNAP-RapA is depicted as a transparent surface with  
578 cartoon models of the RapA-NTD and RNAP clamp as well as CPK representation of Zn bound  
579 at the ZBD. The clamp and Zn of apo-form RNAP are also depicted (gray). The structures are  
580 superimposed by aligning the DPBB domains of RNAP. Steric clash between the RapA-NTD and  
581 ZBD in the opened clamp is indicated by a red arrow and the RapA induced closing of the RNAP  
582 clamp is indicated by a black arrow.

583

584

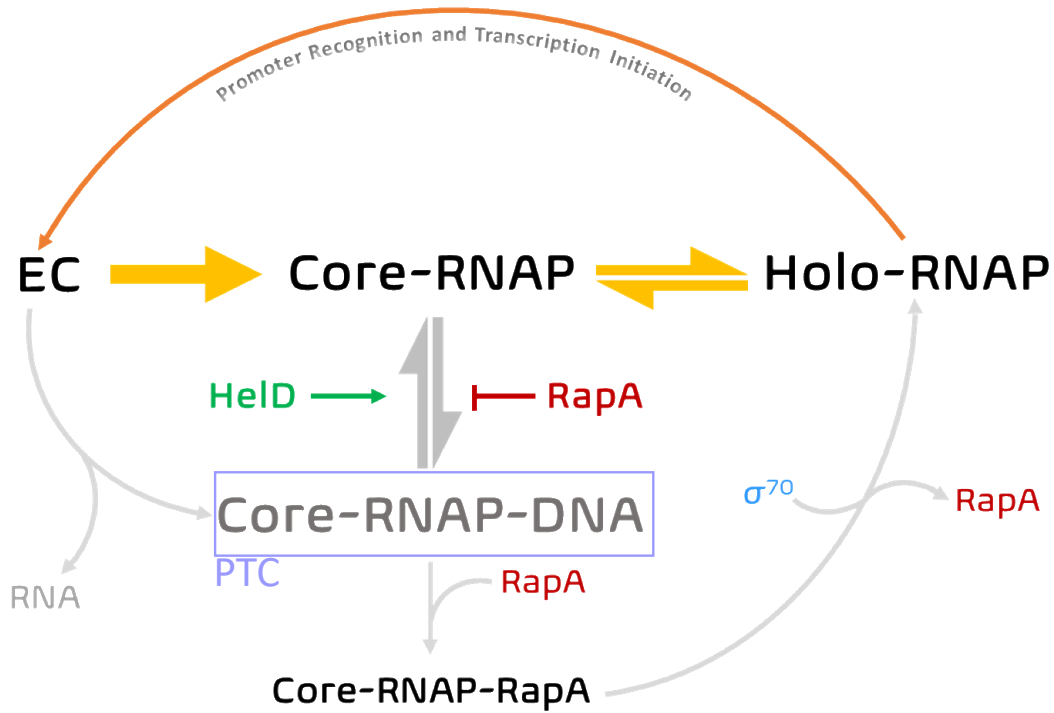

585

586 **Figure 4. RapA-mediated RNAP recycling.** Post-termination, RapA guards the free RNAP  
587 against non-specific association with DNA. RapA can also associate with RNAP released from a  
588 PTC. RapA is competed out from the RNAP-RapA binary complex upon  $\sigma$  factor recruitment and  
589 holoenzyme formation.

590

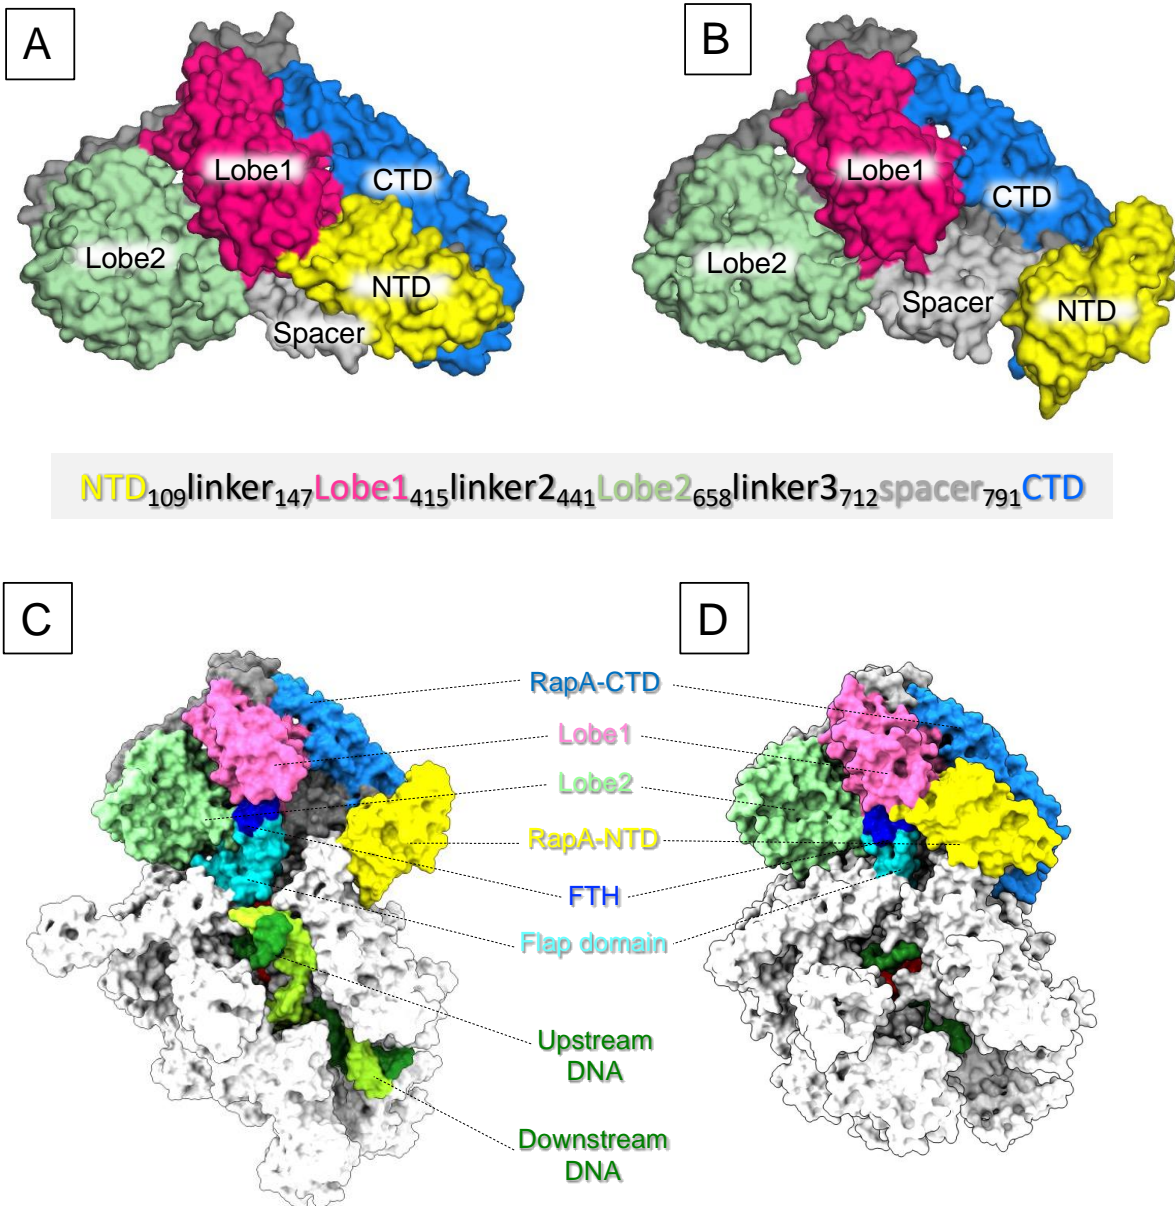

**Cryo-EM structure of RNAP-RapA EC**

**Crystal structure of RNAP-RapA EC**

591

592 **SFigure 1. RapA conformation in apo-form and in RNAP bound form.**

593 RapA conformations found in the crystal structure of apo-form RapA (**A**) and in the cryo-EM

594 structure of EC-RapA (**B**). Comparison of the RapA conformations in the cryo-EM structure (**C**)

595 and the X-ray crystal structure of EC-RapA (**D**) (43).

596

597

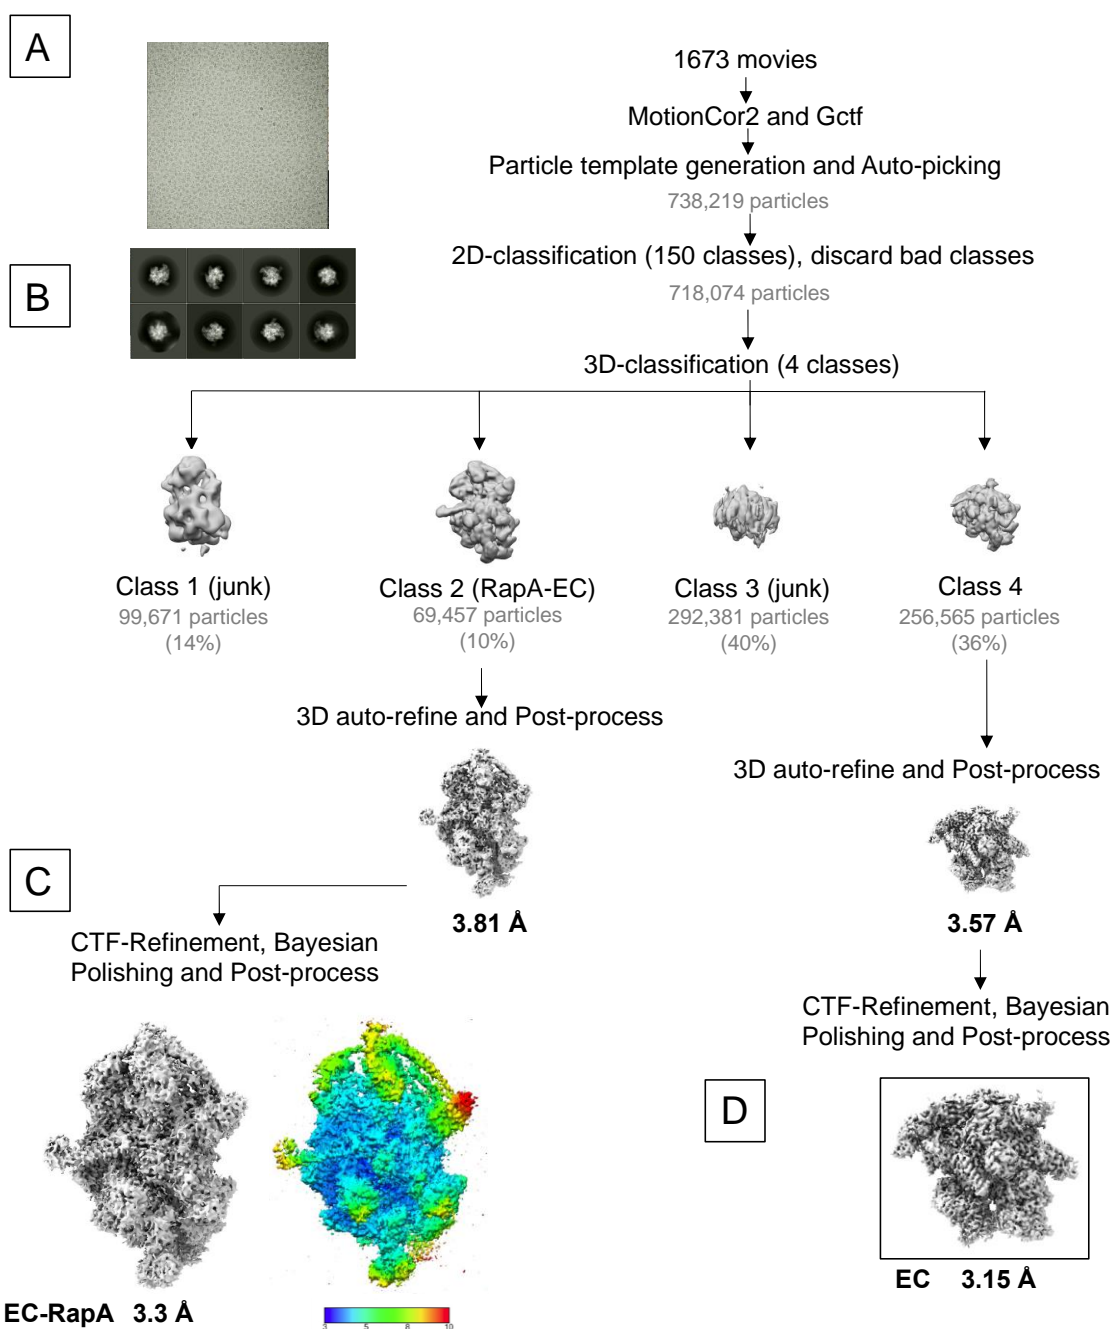

598

599 **SFigure 2. Cryo-EM processing pipeline for RNAP-RapA EC.**

600 **A)** A representative micrograph used for data processing.

601 **B)** Selected representative 2D classes from 2D classification.

602 **C)** The postprocessed cryo-EM density map of EC-RapA. The right view is identical to left but  
603 colored by local resolution.

604 **D)** The postprocessed cryo-EM density map of the EC.

605

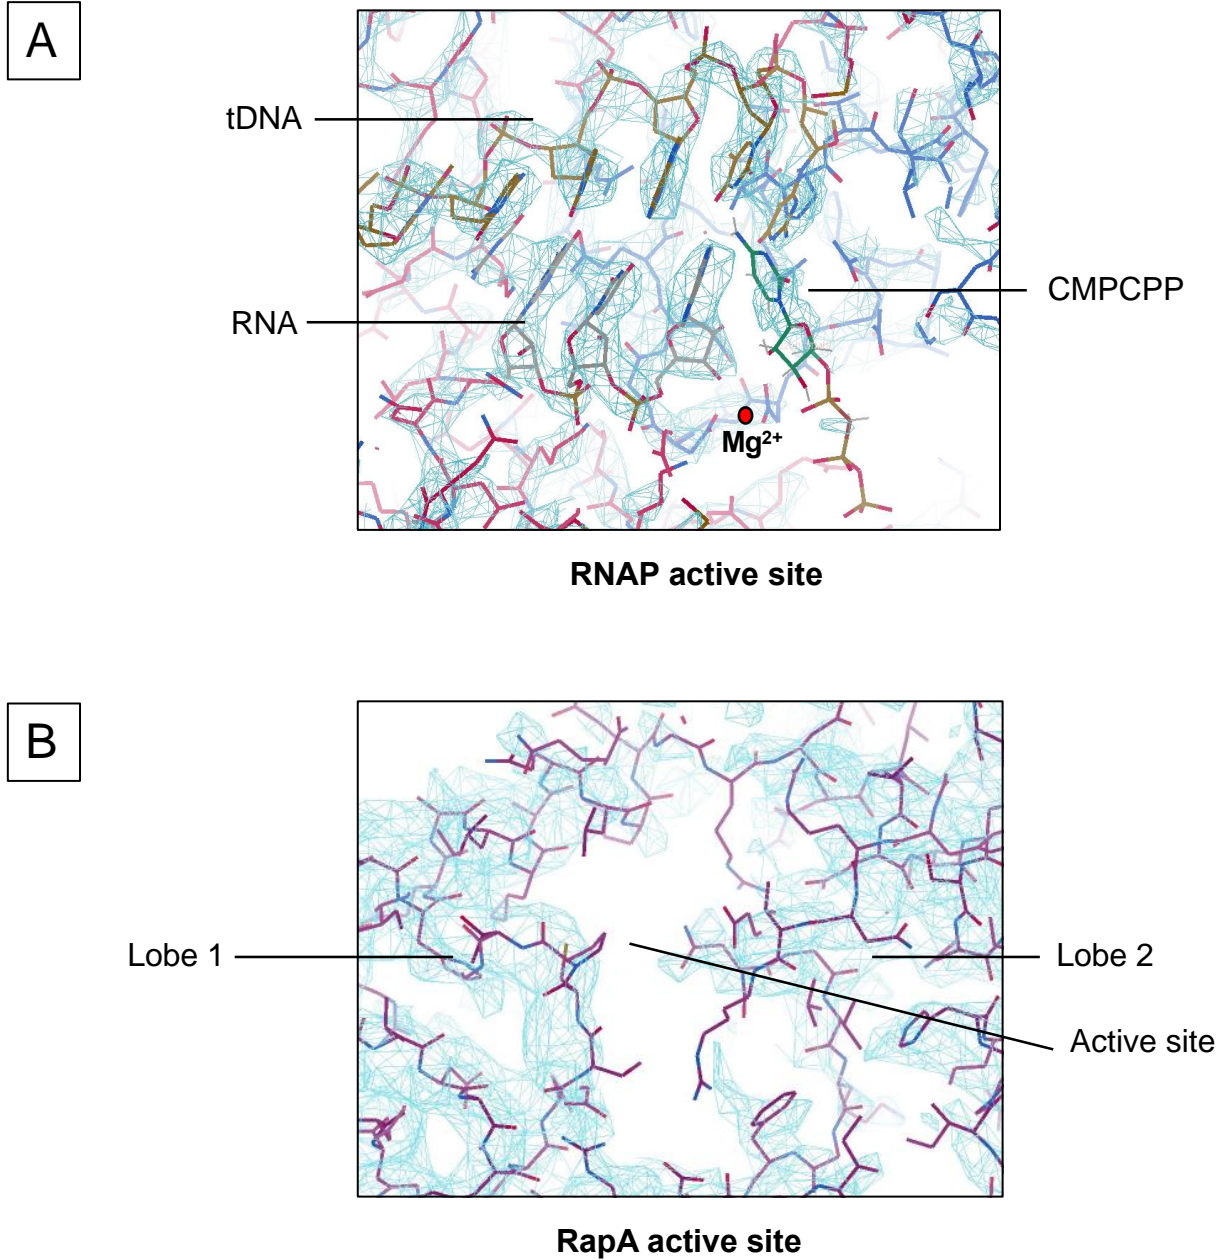

606

607 **SFigure 3. Cryo-EM density maps (blue mesh) at the active sites of RNAP (A) and RapA (B)**

608 **in the EC-RapA.**

609

610



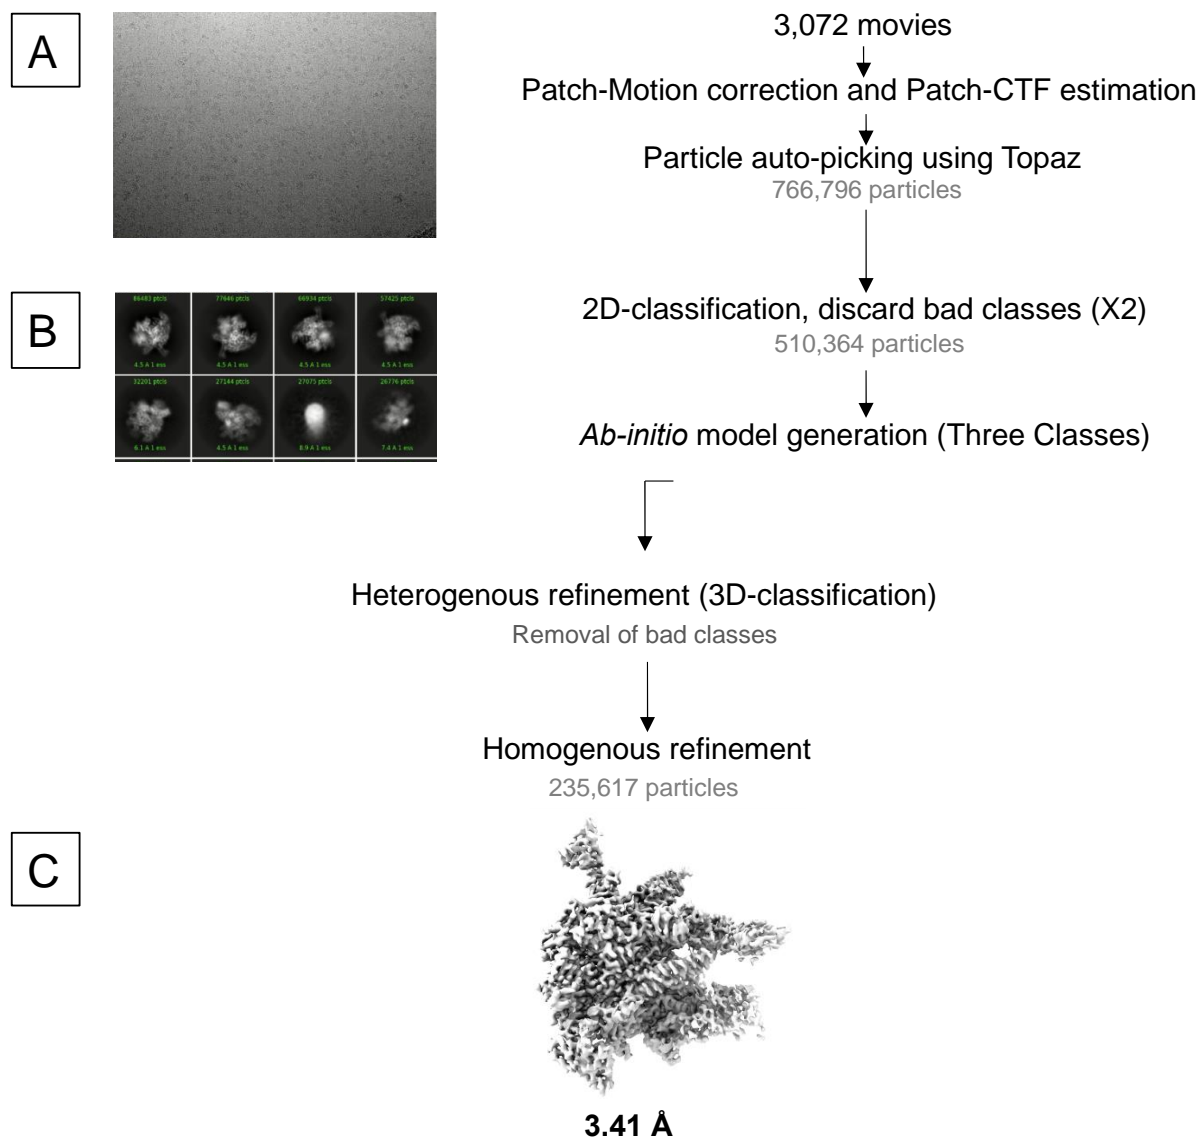

611

612 **SFigure 4. Cryo-EM processing pipeline for RNAP core enzyme.**

613 **A)** A representative micrograph used for data processing.

614 **B)** Selected representative 2D classes from 2D classification.

615 **C)** The postprocessed cryo-EM density map.

616

617

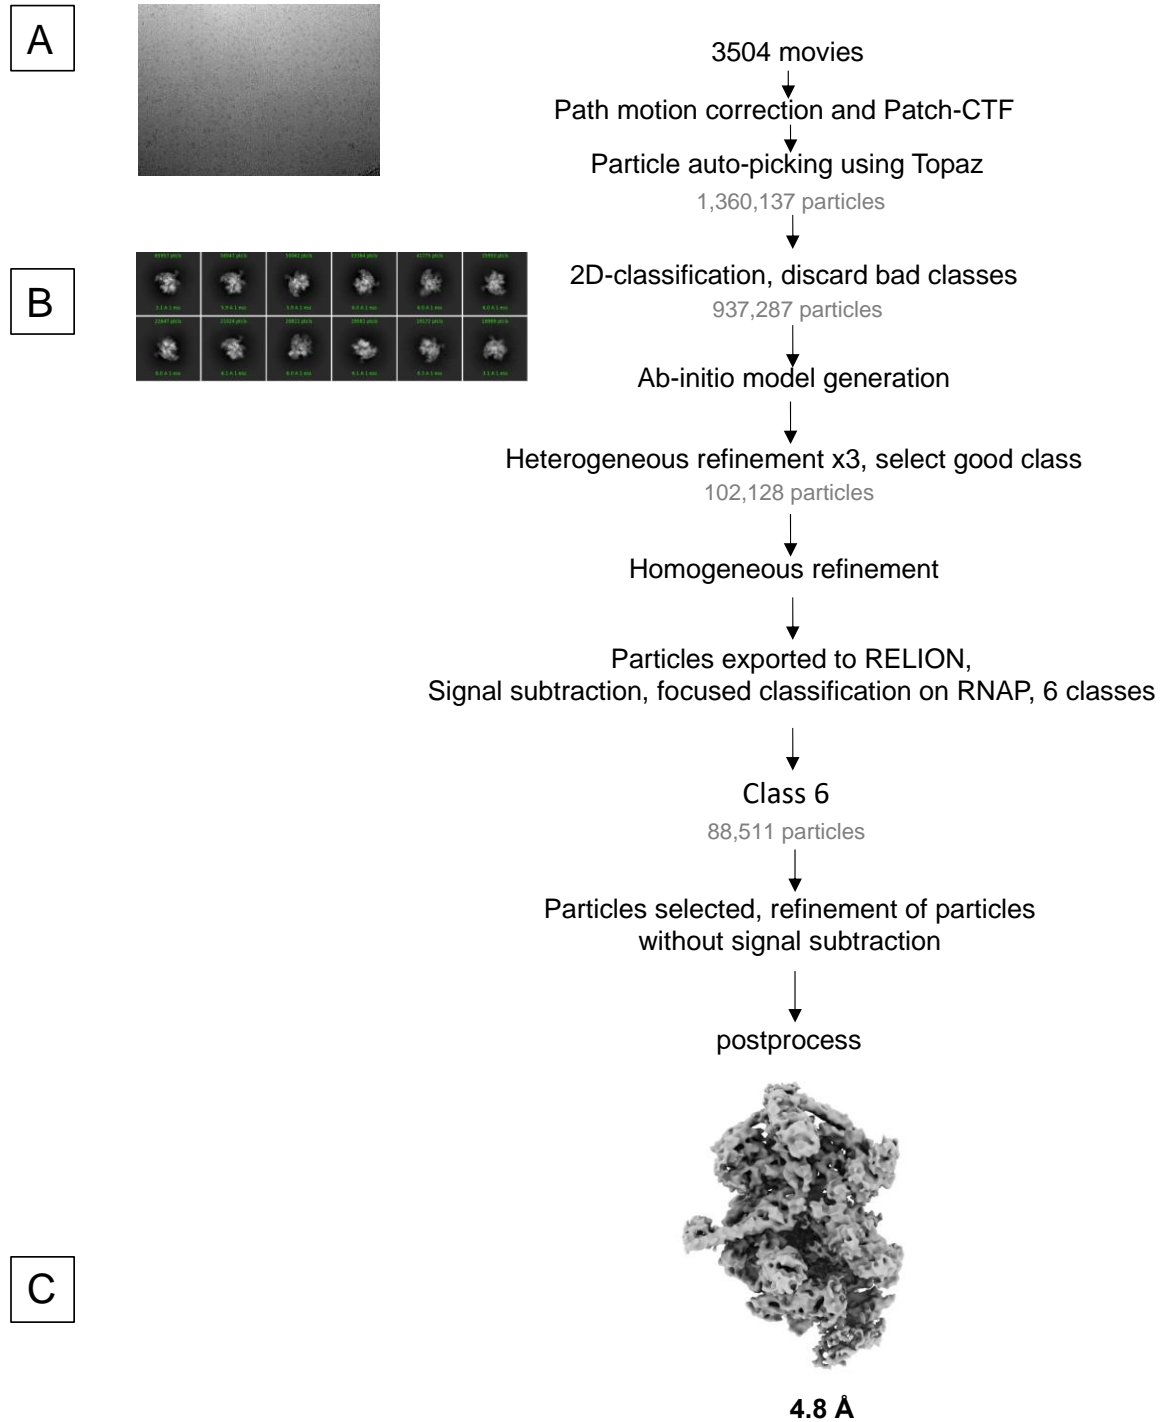

618

619 **SFigure 5. Cryo-EM processing pipeline for RNAP-RapA binary complex.**

620 **A)** A representative micrograph used for data processing.

621 **B)** Selected representative 2D classes from 2D classification.

622 **C)** The postprocessed cryo-EM density map.

623

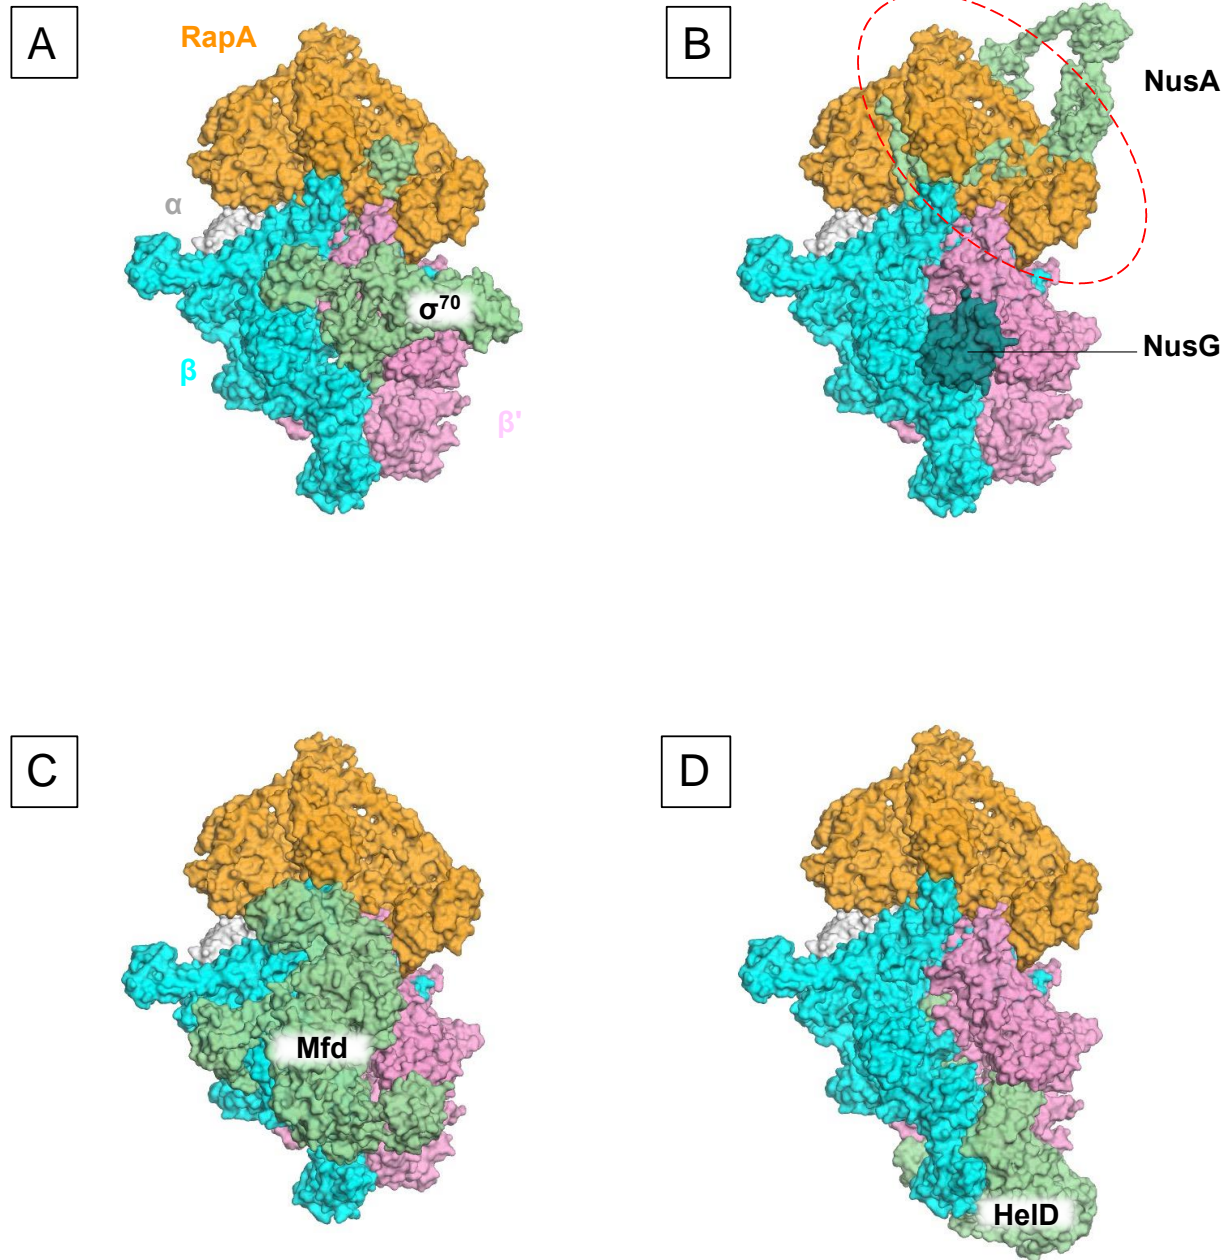

624

625 **SFigure 6. Binding sites of various transcription factors on RNAP compared to RapA.**

626 Occurrence of RapA and HelD is mutually exclusive. Panel (D) depicts them together to emphasize  
627 that their binding sites on RNAP are different.

628

629 **SMovie 1: Cryo-EM structure of *E. coli* RNAP elongation complex with RapA**

630 **SMovie 2: RapA-mediated allosteric closure of the RNAP clamp**

631

632

633  
634  
635  
636

### Supplementary Table 1. Cryo-EM data collection, refinement, and validation statistics

|                                                     | EC-RapA<br>(EMD-23900)<br>(7MKN) | EC<br>(EMD-23901)<br>(7MKO) | coreRNAP<br>(EMD-23902)<br>(7MKP) | RNAP-RapA<br>(EMD-23903)<br>(7MKQ) |
|-----------------------------------------------------|----------------------------------|-----------------------------|-----------------------------------|------------------------------------|
| <b>Data collection and processing</b>               |                                  |                             |                                   |                                    |
| Magnification                                       | 105,000                          | 105,000                     | 81,000                            | 81,000                             |
| Voltage (kV)                                        | 300                              | 300                         | 300                               | 300                                |
| Electron exposure (e <sup>-</sup> /Å <sup>2</sup> ) | 40                               | 40                          | 45                                | 45                                 |
| Defocus range (μm)                                  | -1.0 to -2.5                     | -1.0 to -2.5                | -1.0 to -2.5                      | -1.0 to -2.5                       |
| Pixel size (Å)                                      | 1.32                             | 1.32                        | 1.08                              | 1.08                               |
| Symmetry imposed                                    | C1                               | C1                          | C1                                | C1                                 |
| Initial particle images (no.)                       | 718,074                          | 718,074                     | 275,629                           | 275,629                            |
| Final particle images (no.)                         | 69,457                           | 256,565                     | 49,995                            | 79,275                             |
| Map resolution (Å)                                  | 3.3                              | 3.15                        | 3.41                              | 4.8                                |
| FSC threshold                                       | 0.143                            | 0.143                       | 0.143                             | 0.143                              |
| Map resolution range (Å)                            | 3.0-10.0                         | 3.0-11.0                    | 2.8-6.3                           | 2.7-12.2                           |
| <b>Refinement</b>                                   |                                  |                             |                                   |                                    |
| Initial model used (PDB code)                       | 4S20                             | 7MKN                        | 7MKN                              | 7MKN                               |
| Model resolution (Å)                                | 4.7                              | 3.3                         | 3.3                               | 3.3                                |
| FSC threshold                                       | 0.143                            | 0.143                       | 0.143                             | 0.143                              |
| <i>Model composition</i>                            |                                  |                             |                                   |                                    |
| Non-hydrogen atoms                                  | 34,084                           | 26,269                      | 24,943                            | 32,822                             |
| Protein residues                                    | 4,177                            | 3,194                       | 2,986                             | 4,182                              |
| Ligands                                             | Zn:2, Mg:1,<br>2TM               | Zn:2, Mg:1<br>2TM           | Zn:2, Mg:1                        | Zn:2, Mg:1                         |
| <i>B factors (Å<sup>2</sup>)</i>                    |                                  |                             |                                   |                                    |
| Protein                                             | 64.10                            | 43.13                       | 208.29                            | 144.11                             |
| Nucleotide                                          | 109.24                           | 84.86                       | ---                               | ---                                |
| Ligand                                              | 45.36                            | 41.18                       | 314.91                            | 113.93                             |
| <i>R.m.s. deviations</i>                            |                                  |                             |                                   |                                    |
| Bond lengths (Å)                                    | 0.005                            | 0.007                       | 0.010                             | 0.004                              |
| Bond angles (°)                                     | 1.004                            | 1.048                       | 1.212                             | 0.910                              |
| <i>Validation</i>                                   |                                  |                             |                                   |                                    |
| MolProbity score                                    | 2.3                              | 2.33                        | 2.34                              | 2.18                               |
| Clash score                                         | 21.57                            | 20.99                       | 21.88                             | 16.50                              |
| Rotamer outliers (%)                                | 0.90                             | 1.22                        | 0.52                              | 1.16                               |
| <i>Ramachandran plot</i>                            |                                  |                             |                                   |                                    |
| Favored (%)                                         | 92.50                            | 91.60                       | 91.52                             | 92.58                              |
| Allowed (%)                                         | 7.02                             | 7.93                        | 8.07                              | 6.99                               |
| Disallowed (%)                                      | 0.48                             | 0.47                        | 0.41                              | 0.43                               |
| <i>Model vs. Data</i>                               |                                  |                             |                                   |                                    |
| CC (mask)                                           | 0.69                             | 0.75                        | 0.80                              | 0.79                               |
| CC (box)                                            | 0.71                             | 0.71                        | 0.90                              | 0.81                               |
| CC (peak)                                           | 0.59                             | 0.61                        | 0.77                              | 0.71                               |
| CC (volume)                                         | 0.69                             | 0.72                        | 0.80                              | 0.79                               |
| Mean CC for ligands                                 | 0.68                             | 0.71                        | 0.81                              | 0.85                               |

637

638
